# Supplementary material
Source: PubMed Central journal article supplement (PMC539155)
Supplement: mbc_E04-05-0368_1.pdf [file mbc_E04-05-0368_1.pdf]

# Supplemental Material

**Table 1: Primer sequences for RNAi and RT-PCR.**

|                  | Primers for RNAi                                                                                                                                                                                              | Primers for RT-PCR                                                                                                                                                                                       |
|------------------|---------------------------------------------------------------------------------------------------------------------------------------------------------------------------------------------------------------|----------------------------------------------------------------------------------------------------------------------------------------------------------------------------------------------------------|
| <i>CRK1+CRK2</i> | <p><i>CRK1:</i></p> <p>5'-CTCGAGTTACGAGCGGCTTCAGAAGA-3'</p> <p>5'-TCTAGATCACACCTCCTGAGTGAAC-3'</p> <p><i>CRK2:</i></p> <p>5'-TCTAGATCGTATCATGTTTCAGCTGC-3'</p> <p>5'-ACTAGTAAGCTTTACACCGTCGTCGTCCAACG-3'</p>  | <p><i>CRK1:</i></p> <p>5'-GGGAGTCGTTACGAGCGGCTTCAGAA-3'</p> <p>5'-AACACGTCTGGTGAGCGATAACCACAA-3'</p> <p><i>CRK2:</i></p> <p>5'-CTCGAGAATACATGGAGCAAGACTTG-3'</p> <p>5'-AAGCTTGCCTCATAAGCGGTTATACG-3'</p> |
| <i>CRK1+CRK4</i> | <p><i>CRK1:</i></p> <p>5'-CTCGAGTTACGAGCGGCTTCAGAAGA-3'</p> <p>5'-TCTAGATCACACCTCCTGAGTGAAC-3'</p> <p><i>CRK4:</i></p> <p>5'-TCTAGACAGATTGTTGCGTATAAACG-3'</p> <p>5'-ACTAGTAAGCTTCAACTGTGAAGTCGGAGTGG-3'</p>  | <p><i>CRK1:</i></p> <p>5'-GGGAGTCGTTACGAGCGGCTTCAGAA-3'</p> <p>5'-AACACGTCTGGTGAGCGATAACCACAA-3'</p> <p><i>CRK4:</i></p> <p>5'-CTCGAGCTATGGAGTGGTGTACAAGG-3'</p> <p>5'-AAGCTTGGCCATCCCATAATCACCCA-3'</p> |
| <i>CRK1+CRK6</i> | <p><i>CRK1:</i></p> <p>5'-CTCGAGTTACGAGCGGCTTCAGAAGA-3'</p> <p>5'-TCTAGATCACACCTCCTGAGTGAAC-3'</p> <p><i>CRK6:</i></p> <p>5'-TCTAGAACTTATGGTGTTGTCTTCCG-3'</p> <p>5'-ACTAGTAAGCTTAATCCTCGCCGTCATTCTC-3'</p>   | <p><i>CRK1:</i></p> <p>5'-GGGAGTCGTTACGAGCGGCTTCAGAA-3'</p> <p>5'-AACACGTCTGGTGAGCGATAACCACAA-3'</p> <p><i>CRK6:</i></p> <p>5'-CAAAGTAGACGATGTCGATGCGGATG-3'</p> <p>5'-CAAGCCCAAAGTCCGCCAGTTTCAA-3'</p>  |
| <i>CRK4+CRK2</i> | <p><i>CRK4:</i></p> <p>5'-CTCGAGCAGATTGTTGCGTATAAACG-3'</p> <p>5'-TCTAGACAAGTGTGAAGTCGGAGTGG-3'</p> <p><i>CRK2:</i></p> <p>5'-TCTAGATCGTATCATGTTTCAGCTGC-3'</p> <p>5'-ACTAGTAAGCTTTACACCGTCGTCGTCCAACG-3'</p> | <p><i>CRK4:</i></p> <p>5'-CTCGAGCTATGGAGTGGTGTACAAGG-3'</p> <p>5'-AAGCTTGGCCATCCCATAATCACCCA-3'</p> <p><i>CRK2:</i></p> <p>5'-CTCGAGAATACATGGAGCAAGACTTG-3'</p> <p>5'-AAGCTTGCCTCATAAGCGGTTATACG-3'</p>  |

|                  |                                                                                                                                                                                                  |                                                                                                                                                                                              |
|------------------|--------------------------------------------------------------------------------------------------------------------------------------------------------------------------------------------------|----------------------------------------------------------------------------------------------------------------------------------------------------------------------------------------------|
| <i>CRK2+CRK6</i> | <p><i>CRK2:</i><br/>5'-CTCGAGTCGTATCATGTTTCAGCTGC-3'<br/>5'-TCTAGATACACCGTCGTCGTCCAACG-3'</p> <p><i>CRK6:</i><br/>5'-TCTAGAACTTATGGTGTTGTCTTCCG-3'<br/>5'-ACTAGTAAGCTTAATCCTCGCCGTCATTCTC-3'</p> | <p><i>CRK2:</i><br/>5'-CTCGAGAATACATGGAGCAAGACTTG-3'<br/>5'-AAGCTTGCCTCATAAGCGGTTATACG-3'</p> <p><i>CRK6:</i><br/>5'-CAAACCTAGACGATGTCGATGCGGATG-3'<br/>5'-CAAGCCCAAAGTCCGCCAGTTTCAAA-3'</p> |
| <i>CRK4+CRK6</i> | <p><i>CRK4:</i><br/>5'-CTCGAGCAGATTGTTGCGTATAAACG-3'<br/>5'-TCTAGACAACTGTGAAGTCGGAGTGG-3'</p> <p><i>CRK6:</i><br/>5'-TCTAGAACTTATGGTGTTGTCTTCCG-3'<br/>5'-ACTAGTAAGCTTAATCCTCGCCGTCATTCTC-3'</p> | <p><i>CRK4:</i><br/>5'-CTCGAGCTATGGAGTGGTGTACAAGG-3'<br/>5'-AAGCTTGGCCATCCCATAATCACCCA-3'</p> <p><i>CRK6:</i><br/>5'-CAAACCTAGACGATGTCGATGCGGATG-3'<br/>5'-CAAGCCCAAAGTCCGCCAGTTTCAAA-3'</p> |
